# Supplementary material
Source: bioRxiv or medRxiv preprint supplement (https://www.biorxiv.org/content/biorxiv/early/2022/02/11/2021.08.22.457195/DC1/embed/media-1.pdf)
Supplement: Supplementary file [file media-1.pdf]

Supporting Information

**Sucrose-dependence of sugar uptake, quorum sensing and virulence of the rice blight pathogen *Xanthomonas oryzae* pv. *oryzae***

Mayuri Sadoine<sup>1¶</sup>, Juying Long<sup>2,3,¶</sup>, Congfeng Song<sup>2,3,¶</sup>, Yugander Arra<sup>1</sup>, Wolf B. Frommer<sup>1,4,\*</sup> and Bing Yang<sup>3,5,\*</sup>

**S1 Table. Homologs of the *sux* gene cluster in *Xoo* and *Xcc***

| <b>Xoo position</b> | <b>Xoo gene</b> | <b>Xcc position</b> | <b>Xcc gene</b> | <b>Name<sup>a</sup></b> | <b>sim./ld.<sup>b</sup></b> | <b>Putative function</b>         |
|---------------------|-----------------|---------------------|-----------------|-------------------------|-----------------------------|----------------------------------|
| 4257691-4258722     | PXO_02412       | 3996974-3998005     | XCC3356         | <i>suxR</i>             | 87 %/<br>93 %               | Transcriptional repressor        |
| 4258963-4260294     | PXO_02413       | 3998233-3999552     | XCC3357         | <i>suxC</i>             | 88 %/<br>90 %               | Inner membrane sugar transporter |
| 4260568-4263012     | PXO_02415       | 3999800-4002274     | XCC3358         | <i>suxA</i>             | 87 %/<br>88 %               | TonB-dependent receptor          |
| 4263047-4264963     | PXO_02416       | 4002308-4004221     | XCC3359         | <i>suxB</i>             | 81 %/<br>78 %               | Amylosucrase                     |

<sup>a</sup> in reference to *Xcc* homologs from Blanvillain and Meyer (33)

<sup>b</sup> Top number identity (nucleotide); lower number identity (amino acid) of *Xoo* and *Xcc* genes and proteins, respectively.

**S2 Table. Conservation of the *sux* locus among *Xanthomonas* spp.**

| <b><i>Xanthomonas</i> spp.</b>         | <b><i>suxR</i></b>               | <b><i>suxC</i></b>       | <b><i>suxA</i></b>             | <b><i>suxB</i></b>  | <b>Taxonomy ID</b> |
|----------------------------------------|----------------------------------|--------------------------|--------------------------------|---------------------|--------------------|
|                                        | <b>Transcriptional regulator</b> | <b>Sugar transporter</b> | <b>TonB-dependent receptor</b> | <b>Amylosucrase</b> |                    |
| <i>X. citri</i> pv. <i>malvacearum</i> | GH913_00180                      | GH913_00185              | GH913_00190                    | GH913_00195         | NCBI:txid86040     |
| <i>X. axonopodis</i> pv. <i>citri</i>  | XAC3487                          | XAC3488                  | XAC3489                        | XAC3490             | NCBI:txid346       |
| <i>X. fragariae</i>                    | PD5205_00656                     | PD5205_00655             | PD5205_00654                   | PD5205_00653        | NCBI:txid48664     |
| <i>X. gardneri</i>                     | E1J23_RS0750                     | E1J23_RS0745             | E1J23_00770                    | E1J23_00765         | NCBI:txid90270     |
| <i>X. euvesicatoria</i>                | BJD11_04620                      | BJD11_04615              | BJD11_04610                    | BJD11_04605         |                    |
| <i>X. perforans</i>                    | XPE_17325                        | XPE_17320                | XPE_17315                      | XPE_17310           | NCBI:txid442694    |
| <i>X. cucurbitae</i>                   | EBN15_15595                      | EBN15_15600              | EBN15_15605                    | EBN15_15610         | NCBI:txid56453     |

|                                                 |                              |                              |                              |                                 |                          |
|-------------------------------------------------|------------------------------|------------------------------|------------------------------|---------------------------------|--------------------------|
| <i>X. melonis</i>                               | XmelCFBP4<br>644_08715       | XmelCFBP4<br>644_08720       | XmelCFBP4<br>644_RS087<br>85 | XmelCFBP46<br>44_08730 (C)      | NCBI:txi<br>d56456       |
| <i>X. codiae</i>                                | XcodCFBP4<br>690_RS049<br>25 | XcodCFBP4<br>690_RS049<br>20 | XcodCFBP4<br>690_04895       | XcodCFBP46<br>90_RS04910<br>(s) | NCBI:txi<br>d56463       |
| <i>X.<br/>campestris<br/>pv.<br/>campestris</i> | XCC3356                      | XCC3357                      | XCC3358                      | XCC3359                         | NCBI:txi<br>d340         |
| <i>X. oryzae</i> pv.<br><i>oryzae</i>           | PXO_02412                    | PXO_02413                    | PXO_02415                    | PXO_02416                       | NCBI:txi<br>d64187       |
| <i>X. oryzae</i> pv.<br><i>oryzicola</i>        | XOC_3754                     | XOC_3756                     | XOC_3757                     | XOC_3758                        | NCBI:txi<br>d12939<br>4  |
| <i>X.<br/>axonopodis<br/>pv. glycines</i>       | supR                         | supC                         | supO                         | supH                            | NCBI:txi<br>d47342<br>1  |
| <i>X.<br/>translucens<br/>pv. undulosa</i>      | F0H33_159<br>25              | F0H33_159<br>30              | F0H33_159<br>35              | F0H33_1594<br>0                 | NCBI:txi<br>d48790<br>9  |
| <i>X. campestris<br/>pv.<br/>vesicatoria</i>    | XCV3615                      | XCV3616                      | XCV3617                      | XCV3618                         | NCBI:txi<br>d45632<br>7  |
| <i>X. vasicola<br/>pv.<br/>vasculorum</i>       | CXP37_180<br>50              | CXP37_180<br>60              | CXP37_180<br>65              | CXP37_1807<br>0                 | NCBI:txi<br>d32577<br>6  |
| <i>X.<br/>axonopodis<br/>pv. manihotis</i>      | No data                      | AO826_198<br>85              | AO826_198<br>80              | AO826_1987<br>5                 | NCBI:txi<br>d43353       |
| <i>X. arboricola<br/>pv. juglandis</i>          | AKJ12_147<br>15              | AKJ12_147<br>20              | AKJ12_147<br>25              | AKJ12_1473<br>0                 | NCBI:txi<br>d19570<br>9  |
| <i>X. phaseoli<br/>pv. phaseoli</i>             | AC610_179<br>30              | AC610_179<br>35              | AC610_179<br>40              | AC610_1794<br>5                 | NCBI:txi<br>d19852<br>54 |
| <i>X. cynarae<br/>CFBP 4188</i>                 | XcyCFBP41<br>88_RS1092<br>0  | XcyCFBP41<br>88_RS1092<br>5  | XcyCFBP41<br>88_RS1093<br>0  | XcyCFBP418<br>8_RS10935         | NCBI:txi<br>d10921<br>4  |
| <i>X. hortorum<br/>VT106</i>                    | DYQ48_045<br>80              | DYQ48_045<br>75              | DYQ48_045<br>70              | DYQ48_0456<br>5                 | NCBI:txi<br>d56454       |
| <i>X. bromi<br/>CFBP 1976</i>                   | XbrCFBP19<br>76_RS0026<br>5  | XbrCFBP19<br>76_RS0026<br>0  | XbrCFBP19<br>76_RS0023<br>5  | ?                               | NCBI:txi<br>d56449       |
| <i>X. prunicola<br/>CFBP 8553</i>               | XpruCFBP8<br>353_04425       | XpruCFBP8<br>353_RS044<br>35 | XpruCFBP8<br>353_RS044<br>40 | XpruCFBP83<br>53_RS04445        | NCBI:txi<br>d20539<br>30 |
| <i>X. vasicola<br/>NCPPB 1060</i>               | NX81_0187<br>10              | NX81_0187<br>15              | NX81_0187<br>20              | NX81_01872<br>5                 | NCBI:txi<br>d:56459      |

|                                                             |                        |                        |                        |                        |                         |
|-------------------------------------------------------------|------------------------|------------------------|------------------------|------------------------|-------------------------|
| <i>X. axonopodis</i><br><i>Xac29-1</i>                      | XAC29_177<br>60        | XAC29_177<br>65        | XAC29_177<br>70        | XAC29_1777<br>5        | NCBI:txi<br>d53413      |
| <i>X. fuscans</i><br><i>subsp.</i><br><i>fuscans</i>        | AC614_177<br>55        | AC614_177<br>60        | AC614_177<br>65        | AC614_1777<br>0        | NCBI:txi<br>d36664<br>9 |
| <i>X. citri</i> <i>pv.</i><br><i>malvacearu</i><br><i>m</i> | GH913_001<br>80        | GH913_001<br>85        | GH913_001<br>90        | GH913_0019<br>5        | NCBI:txi<br>d86040      |
| <i>X. citri</i> <i>subsp.</i><br><i>citri</i>               | B7L67_073<br>15        | B7L67_073<br>20        | B7L67_0732<br>5        | B7L67_0733<br>0        | NCBI:txi<br>d61130<br>1 |
| <i>X. pisi</i> DSM<br>1856                                  | Y887_0487<br>0         | Y887_0487<br>5         | Y887_04880             | Y887_04885             | NCBI:txi<br>56457       |
| <i>X. melonis</i><br><i>CFBP4644</i>                        | XmelCFBP4<br>644_08715 | XmelCFBP4<br>644_08720 | XmelCFBP4<br>644_08725 | XmelCFBP46<br>44_08730 | NCBI:txi<br>d56456      |

**S3 Table. Bacterial strains and plasmids used in this study.**

| Designation                                        | Genotypes or relevant characteristics <sup>a</sup>                                                                                                                                                       | Source or reference                                |
|----------------------------------------------------|----------------------------------------------------------------------------------------------------------------------------------------------------------------------------------------------------------|----------------------------------------------------|
| Plasmids                                           |                                                                                                                                                                                                          |                                                    |
| pGEM-T                                             | Resistance to carbenicillin (Cb')                                                                                                                                                                        | Promega Corp.                                      |
| pSKsacB-Kn                                         | Kanamycin (Kn') from pKD13 and <i>sacB</i> gene from pKNG101 fusion in pBluescript KS(+)                                                                                                                 | Refs. (62,63)<br>Stratagene, Inc., La Jolla, Calif |
| pHM1                                               | Broad host range vector, spectinomycin resistant, polylinker, <i>cos</i> site                                                                                                                            | Ref. (64)                                          |
| pHM1/SuxR                                          | <i>suxR</i> ORF cloned in pHM1                                                                                                                                                                           | This study                                         |
| pHM1/SuxA                                          | <i>suxA</i> ORF cloned in pHM1                                                                                                                                                                           | This study                                         |
| pHM1/SuxC                                          | <i>suxC</i> ORF and promoter cloned in pHM1                                                                                                                                                              | This study                                         |
| pΔSuxR                                             | 5' and 3' sequences of <i>suxR</i> cloned in pGEM-T for a deletion in <i>suxR</i> , and <i>sacB-kn</i> cassette fused in <i>SpeI</i> site of pGEM-T backbone.                                            | This study                                         |
| pΔSuxA                                             | 5' and 3' sequences of <i>suxA</i> cloned in pGEM-T for a deletion in <i>suxA</i> , and <i>sacB-kn</i> cassette fused in <i>SpeI</i> site of pGEM-T backbone                                             | This study                                         |
| pΔSuxC                                             | 5' and 3' sequences of <i>suxC</i> cloned in pGEM-T for a deletion in <i>suxC</i> , and <i>sacB-kn</i> cassette fused in <i>SpeI</i> site of pGEM-T backbone                                             | This study                                         |
| pΔSux                                              | 5' sequence of <i>suxR</i> and 3' sequences of <i>suxC</i> cloned in pGEM-T for a deletion in from <i>suxR</i> to <i>suxC</i> , and <i>sacB-kn</i> cassette fused in <i>SpeI</i> site of pGEM-T backbone | This study                                         |
| <i>Escherichia coli</i>                            |                                                                                                                                                                                                          |                                                    |
| XL1-Blue MRF'                                      | <i>F'proAB lacI qZΔM15 Tn10</i> (Tet')                                                                                                                                                                   | Stratagene                                         |
| <i>Xanthomonas oryzae</i> <i>pv.</i> <i>oryzae</i> |                                                                                                                                                                                                          |                                                    |
| PXO99 <sup>A</sup>                                 | Philippine race 6; azacytidine resistant clone of PXO99                                                                                                                                                  | Ref. (64)                                          |
| Δ <i>sux</i>                                       | <i>suxR-suxC-suxA-suxB</i> deleted in PXO99 <sup>A</sup>                                                                                                                                                 | This study                                         |
| Δ <i>suxA</i>                                      | <i>suxA</i> mutant of PXO99 <sup>A</sup>                                                                                                                                                                 | This study                                         |
| Δ <i>suxB</i>                                      | <i>suxB</i> mutant of PXO99 <sup>A</sup>                                                                                                                                                                 | This study                                         |
| Δ <i>suxC</i>                                      | <i>suxC</i> mutant of PXO99 <sup>A</sup>                                                                                                                                                                 | This study                                         |
| Δ <i>suxR</i>                                      | <i>suxR</i> mutant of PXO99 <sup>A</sup>                                                                                                                                                                 | This study                                         |
| Δ <i>suxA/suxA</i>                                 | Δ <i>suxA</i> complemented with <i>suxA</i> under the <i>lacZ</i> promoter in pHM1                                                                                                                       | This study                                         |

|                       |                                                                                                                                                      |            |
|-----------------------|------------------------------------------------------------------------------------------------------------------------------------------------------|------------|
| $\Delta$ suxA/pA-suxA | $\Delta$ suxA complemented with <i>suxA</i> under putative promoter of <i>suxA</i> in the opposite direction of the <i>lacZ</i> promoter in pHM1     | This study |
| $\Delta$ suxB/suxB    | $\Delta$ suxB complemented with <i>suxB</i> under the <i>lacZ</i> promoter in pHM1                                                                   | This study |
| $\Delta$ suxB/pA-suxB | $\Delta$ suxB complemented with <i>suxB</i> under the putative promoter of <i>suxB</i> in the opposite direction of the <i>lacZ</i> promoter in pHM1 | This study |
| $\Delta$ suxC/suxC    | $\Delta$ suxC complemented with <i>suxC</i> under the <i>lacZ</i> promoter in pHM1                                                                   | This study |
| $\Delta$ suxC/pC-suxC | $\Delta$ suxC complemented with <i>suxC</i> under putative promoter of <i>suxC</i> in the opposite direction of the <i>lacZ</i> promoter in pHM1     | This study |
| $\Delta$ suxR/suxR    | $\Delta$ suxR complemented with <i>suxR</i> under the <i>lacZ</i> promoter in pHM1                                                                   | This study |
| $\Delta$ suxR/pR-suxR | $\Delta$ suxR complemented with <i>suxR</i> under the putative promoter of <i>suxR</i> in the opposite direction of the <i>lacZ</i> promoter in pHM1 | This study |

**S4 Table. Oligonucleotides**

| Name                               | Sequence (5' - 3')                               | Use                                                                                             |
|------------------------------------|--------------------------------------------------|-------------------------------------------------------------------------------------------------|
| SuxA-F1                            | CGCGGATCCCGGCGCCAGATAGTTGT<br>AG                 | PCR-amplification of upstream sequence of <i>suxA</i> for <i>suxA</i> deletion                  |
| SuxA-R1                            | CGGAATTCGCGAGGAAGATGTCGGAGTT                     |                                                                                                 |
| SuxA-F2                            | CGGAATTCGATCCAACCGGTGGAACAAC                     | PCR-amplification of downstream sequence of <i>suxA</i> for <i>suxA</i> deletion                |
| SuxA-R2                            | AACTGCAGGTACAACGTCTGCAAGGCAT<br>C                |                                                                                                 |
| <i>suxA</i> (p+ cds) F-u (Sacl)    | CCCATGTACGGCATGCGCC                              | PCR-amplification and reconstruction of <i>suxA</i> for complementation of $\Delta$ <i>suxA</i> |
| <i>suxA</i> (p+ cds) F-d           | GCGCGAGATGGGATGC                                 |                                                                                                 |
| <i>suxA</i> (p+ cds) R-u           | CGAATTTCCGCGAGCGACATC                            |                                                                                                 |
| <i>suxA</i> (p+ cds) R-d (HindIII) | CCCGTGCTATTAGAAACCGCCG                           |                                                                                                 |
| <i>suxAc</i> ds-u (HindIII)        | AAGCTT<br>TTAAAAGTCGTAACGCAGGCTGAT               | PCR-amplification and reconstruction of <i>suxA</i> for complementation of $\Delta$ <i>suxA</i> |
| <i>suxAc</i> ds-d (Sacl)           | GAGCTCATGTCCACCTTGACACCCT                        |                                                                                                 |
| SuxB-F1, (PstI)                    | CTGCAGAAATCACCAGCCAGCGTTTC                       | PCR-amplification of upstream sequence of <i>suxB</i> for <i>suxB</i> deletion                  |
| SuxB-R1, (Sacl)                    | GAGCTCGAGATCGCCAGTTCTCCCA                        |                                                                                                 |
| SuxB-F2, (Sacl)                    | GAGCTCGCACGATGCAGAGAGCCTAA                       | PCR-amplification of downstream sequence of <i>suxB</i> of <i>suxB</i> deletion                 |
| SuxB-F2, (BamHI)                   | GGATCCATGACCAAGATCGTGCCGTT                       |                                                                                                 |
| <i>suxAp</i> -u, (Sacl)            | GAGCTC ATCGGCCCGGCCAG                            | PCR-amplification of <i>suxA</i> promoter sequence                                              |
| <i>suxAp</i> -d,                   | ATTGATCGGGGAGGTGCTCATTGCGATT<br>CTCTCTCTCTCTCAGC |                                                                                                 |
| <i>suxB</i> cds-u                  | CGTGAGAGAGAGAGAGAATCGCA<br>ATGAGCACCTCCCCGATCAAT | PCR-amplification and reconstruction of <i>suxB</i> for complementation of $\Delta$ <i>suxB</i> |
| <i>suxB</i> cds-d, (KpnI)          | GGTACCTCAGGCACCGCGCTGC                           |                                                                                                 |
| <i>suxB</i> cds-u (KpnI)           | GGTACC ATGAGCACCTCCCCGATCAAT                     |                                                                                                 |
| <i>suxB</i> cds-d (Sacl)           | GAGCTCTCAGGCACCGCGCTGC                           |                                                                                                 |
| SuxC-F1 (PstI)                     | CTGCAG GCTTCGACGATATCCCGCTG                      | PCR-amplification of upstream sequence of <i>suxC</i> for <i>suxC</i> deletion                  |
| SuxC-R1 (BamHI)                    | GGATCC GATGGTGTGTGTGCGCTTG                       |                                                                                                 |
| SuxC-F2 (BamHI)                    | GGATCC TGCAATACCAAGCCGGTCAT                      | PCR-amplification of downstream sequence of <i>suxC</i> for <i>suxC</i> deletion                |
| SuxC-R2 (XbaI)                     | TCTAGA AGGAAACGACCGCACAGG                        |                                                                                                 |
| <i>suxC</i> (p+cds)-u (Sacl)       | GAGCTCCCGAGACGCTGGATTTCATTT                      |                                                                                                 |

|                                   |                              |                                                                                                 |
|-----------------------------------|------------------------------|-------------------------------------------------------------------------------------------------|
| suxC (p+cds)-d ( <i>HindIII</i> ) | AAGCTTTTATGAGCGGCTCTCAACCAA  | PCR-amplification and reconstruction of <i>suxC</i> for complementation of $\Delta$ <i>suxC</i> |
| suxCcds-u ( <i>HindIII</i> )      | AAGCTT ATGTCGTCGACCGTTCC     |                                                                                                 |
| suxCcds-d ( <i>SacI</i> )         | GAGCTCTTATGAGCGGCTCTCAACCAA  | PCR-amplification and reconstruction of <i>suxC</i> for complementation of $\Delta$ <i>suxC</i> |
| SuxR-F1 ( <i>BamHI</i> )          | GGATCC CCTCGATCAGCAGCTTTCCA  | PCR-amplification of upstream sequence of <i>suxR</i> for <i>suxR</i> deletion                  |
| SuxR-R1 ( <i>KpnI</i> )           | GGTACC CACCGTGTGGAGCGTTG     |                                                                                                 |
| SuxR-F2 ( <i>KpnI</i> )           | GGTACC AAGATGCGTACCGCCTCAC   | PCR-amplification of downstream sequence of <i>suxR</i> for <i>suxR</i> deletion                |
| SuxR-R2 ( <i>PstI</i> )           | CTGCAGGCAACCCCTACCTGATGCTG   |                                                                                                 |
| suxR (p+cds)-u ( <i>SacI</i> )    | GAGCTCCGGTCAATGGCGGGCTCC     | PCR-amplification and reconstruction of <i>suxR</i> for complementation of $\Delta$ <i>suxR</i> |
| suxR (p+cds)-d ( <i>HindIII</i> ) | AAGCTTTCACGCCGACTCGCGCA      |                                                                                                 |
| suxRcds-u ( <i>HindIII</i> )      | AAGCTTATGGCCAAACCTTCAGAACGC  | PCR-amplification and reconstruction of <i>suxR</i> for complementation of $\Delta$ <i>suxR</i> |
| suxRcds-d ( <i>SacI</i> )         | GAGCTCTCACGCCGACTCGCGCA      |                                                                                                 |
| Sux-F1 ( <i>PstI</i> )            | CTGCAG CAATTCGCTACCGCCAAGG   | PCR-amplification of upstream sequence of <i>sux</i> for <i>sux</i> deletion                    |
| Sux-R1 ( <i>BamHI</i> )           | GGATCC GCAATCTGCTTGATGTAGGCG |                                                                                                 |
| Sux-F2 ( <i>BamHI</i> )           | GGATCC CTGGATGATCCTCGCCTGTTC | PCR-amplification of downstream sequence of <i>sux</i> for <i>sux</i> deletion                  |
| Sux-R2 ( <i>XbaI</i> )            | TCTAGA ATCGCGTCACTGGCTTCAC   |                                                                                                 |
| 2413F1                            | CAGGAACGCGACGAAATTATAG       | RT-PCR detection of <i>suxC</i>                                                                 |
| 2413R1                            | AACGCGCACCATATTCCTTAC        |                                                                                                 |
| 2416F1                            | ACTTCGTCCTCAACCACACC         | RT-PCR detection of <i>suxB</i>                                                                 |
| 2416R1                            | CGGATTGCTCCAGTTCAAATC        |                                                                                                 |

**Table S5:** Threshold cycle (range) for various analyzed genes relative to 16S rRNA

|         | <b>16S</b> | <b>RpoN1</b> | <b>RpoN2</b> | <b>gumB</b> | <b>gumD</b> | <b>rpfF</b> | <b>rpfC</b> | <b>rpfG</b> |
|---------|------------|--------------|--------------|-------------|-------------|-------------|-------------|-------------|
| Suc 2 h | 25-26      | 19-20        | 19-20        | 23-24       | 19-20       | 25-26       | 23-24       | 23-24       |
| Glc 2 h | 17-21      | 20-21        | 24-25        | 25-28       | 25-27       | 29-30       | 26-27       | 24-25       |

**Table S6:** Comparison cfu/mL and OD<sub>600</sub>

|                          | <b>OD<sub>600</sub></b> | <b>Log CFU/mL</b> |
|--------------------------|-------------------------|-------------------|
| <b>PXO99<sup>A</sup></b> | 0.015                   | 6.47 ± 0.04       |
|                          | 0.025                   | 6.90 ± 0.13       |
|                          | 0.102                   | 7.87 ± 0.09       |
|                          | 0,129                   | 8.21 ± 0.003      |
|                          | 0,217                   | 8.36 ± 0.03       |
|                          | 0.359                   | 9.18 ± 0.55       |
|                          | 1.555                   | 9.59 ± 0.12       |
|                          | 2.702                   | 9.63 ± 0.04       |

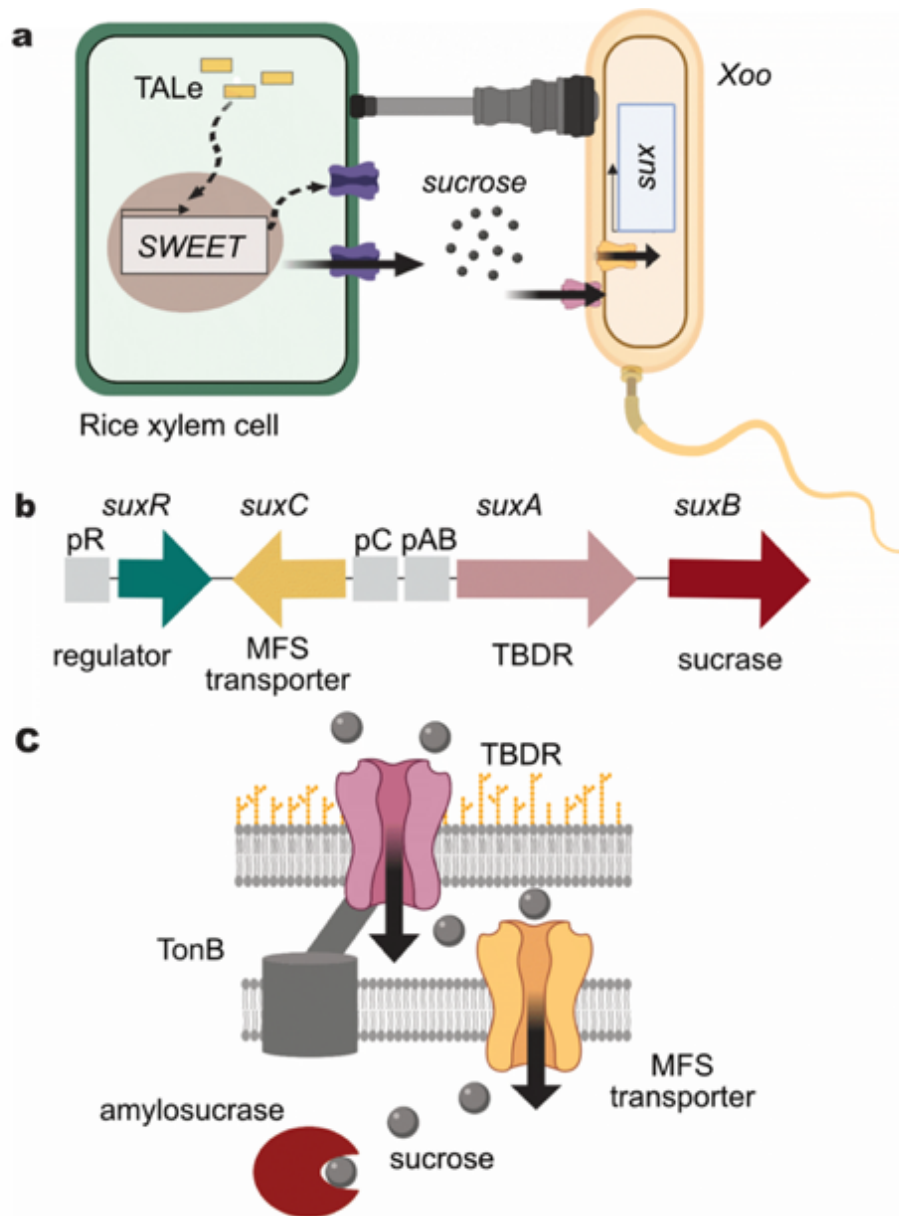

**S1 Figure. Potential functions of *Xoo*-encoded *suc* gene products in sucrose uptake and utilization in the rice leaf xylem.** Model of the feeding hypothesis in which the *suc* gene cluster components enable *Xoo* to utilize sucrose exported by SWEETs from the xylem parenchyma into the apoplasmic space. The activity of the SWEETs is triggered by TAL effectors from *Xoo*. Sucrose is imported across the outer membrane of *Xoo* by SuxA, a TonB-dependent receptor, then taken up across the inner membrane with the help of SuxC, a major facilitator superfamily (MFS) sucrose transporter. Intracellular sucrose is detected by SuxR, a LacI-type repressor, which derepresses the other *suc* genes in a sucrose-dependent manner. SuxB hydrolyzes sucrose to produce glucose and fructose, which are further metabolized in the cell. TonB is typically involved in transducing energy to multiple TBDRs, and is encoded by a separate gene.

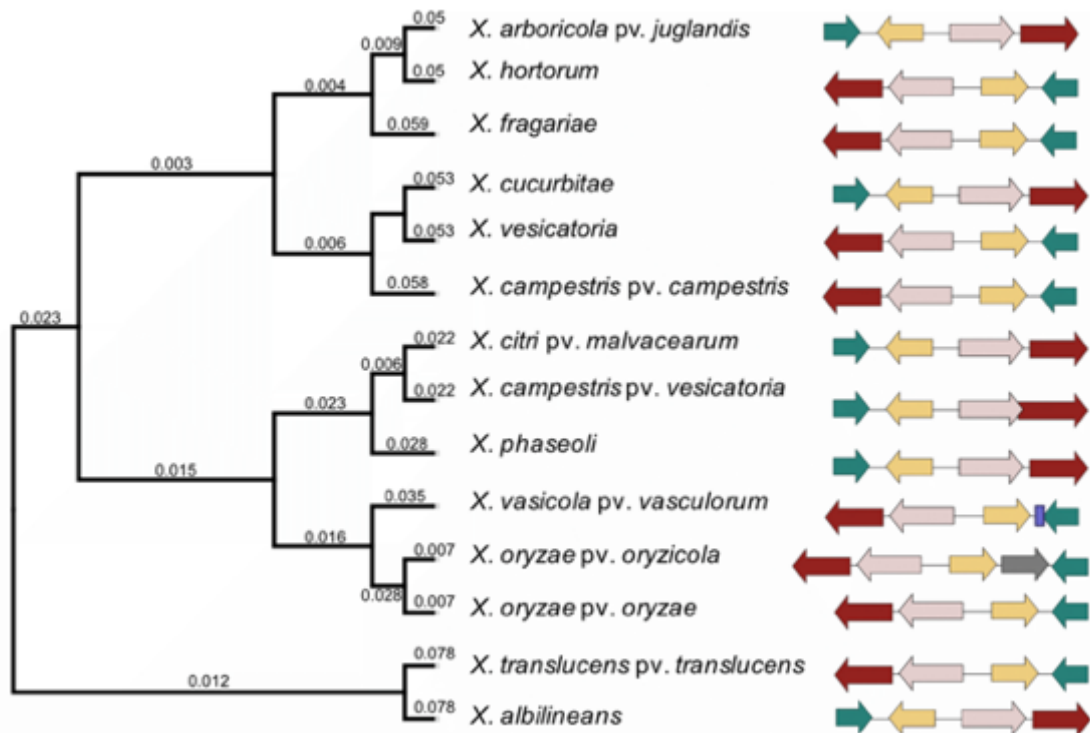

**S2 Figure. Conservation of *sux* gene cluster in different *Xanthomonas* spp.** Phylogenetic tree was generated using an alignment of a concatenated *sux* ORF cluster sequence (only coding regions were used in concatenated form). Sequences from 14 species: *X. arboricola* pv. *juglandis*, *X. citri* pv. *malvacearum*, *X. vasicola* pv. *vasculorum*, *X. cucurbitae*, *X. phaseoli*, *X. oryzae* pv. *oryzicola*, *X. oryzae* pv. *oryzae*, *X. hortorum*, *X. fragariae*, *X. campestris* pv. *vesicatoria*, *X. vesicatoria*, *X. campestris* pv. *campestris*, *X. translucens* pv. *translucens*, and *X. albilineans*.

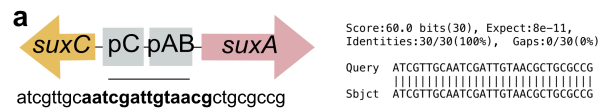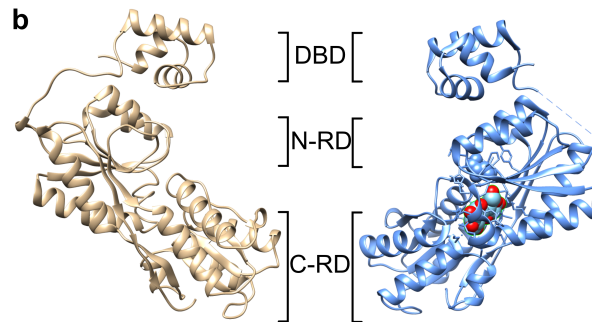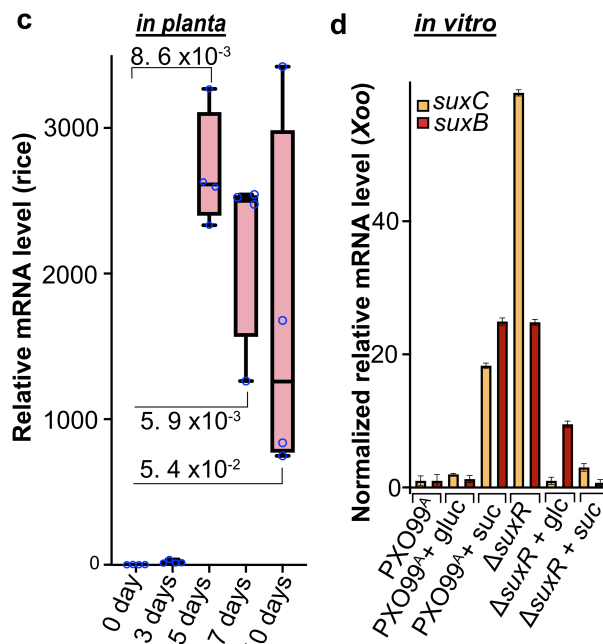

**S3 Figure: Sucrose-dependent derepression of *sux* genes by SuxR.** **a.** Predicted binding region for the LacI-type HDH domain transcriptional regulator SuxR found by homology to the predicted binding site of *Xam* and *Xag* homologs from the RegPrecise database (54). **b.** 3D homology model of SuxR (Magenta) based on the structure of the LacI transcriptional regulator CelR in complex with cellobiose (PDB ID: 5ysz). **c.** *suxA* transcript levels during infection of Kitaake as determined using qRT-PCR (0, 3, 5, 7 and 10 days after infection). **d.** qRT-PCR analyses of *suxB* and *suxC* mRNA levels in *Xoo* growing on NB without sugar or 1 % sucrose or glucose in  $\Delta$ *suxR*. Values are derived from four biological replicates, each with three technical replicates. Boxes extend from 25th to 75th percentiles and display median values as center lines. Whiskers plot minimum and maximum values and individual data points. Significance was calculated between two groups using unpaired two-tailed Student's *T* test at the 95 % confidence level and Welch's correction of unequal variances. The  $2^{-\Delta\Delta C_t}$  method was used for relative quantification with 16S rRNA as reference. Relative mRNA levels *in vitro* are normalized to 1 for values for data from PXO99<sup>A</sup> without added sugar. Relative mRNA levels *in planta* are normalized to 1 for values for data at 0 day. Comparable results were obtained in three independent experiments. DBD: DNA binding domain; N-RD: N-terminus regulatory domain; C-RD: C-terminus regulatory domain.



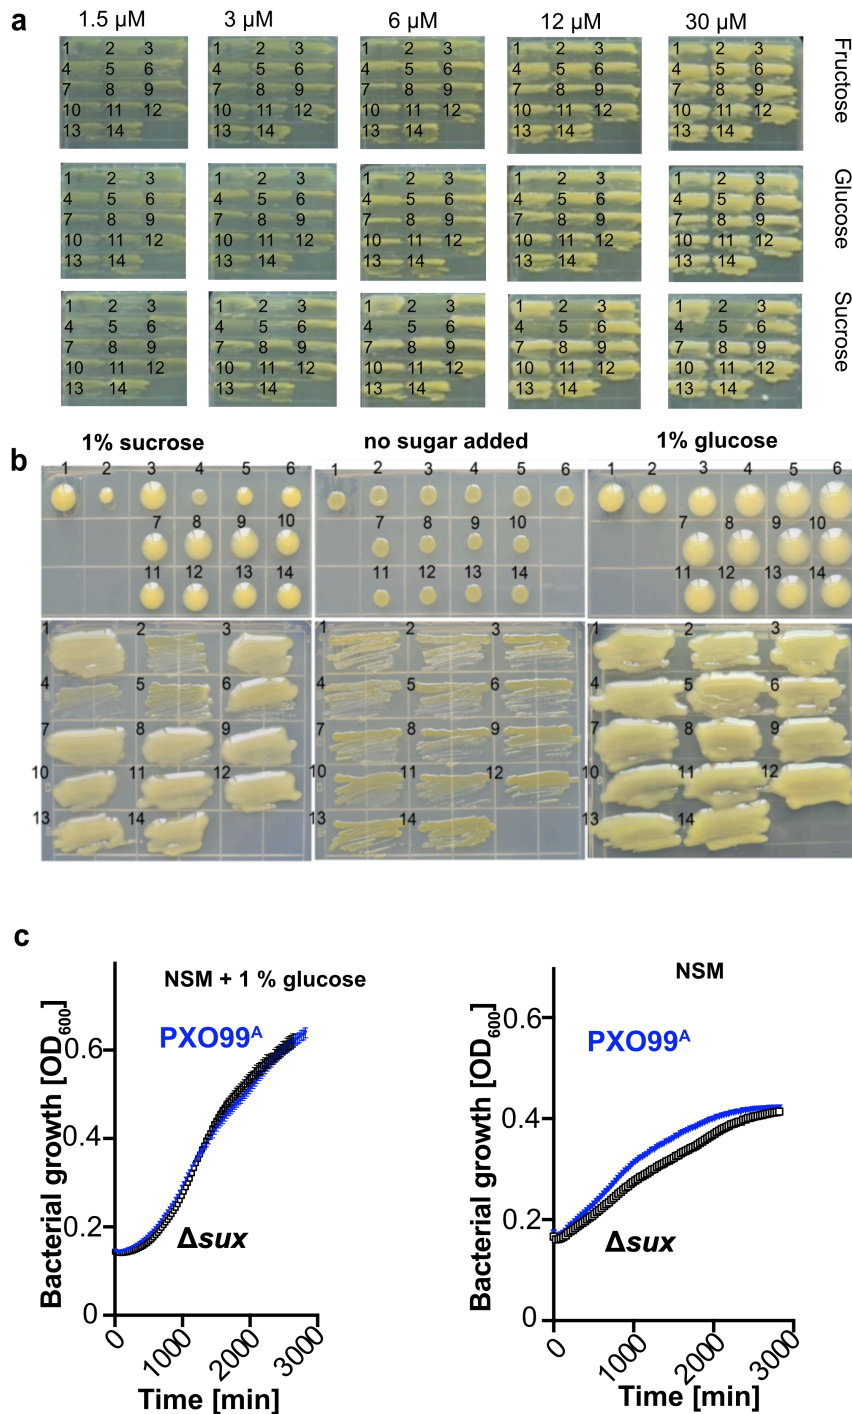

**S4 Figure. Growth and colony phenotypes of *sux* mutants.** **a.** Mucooid and dry colony phenotypes of *sux* mutants on NB with low concentration of sugar (1.5, 3, 6, 12 and 30  $\mu$ M) and **b.** on NBN, NBN + 1 % sucrose or NBN + 1 % glucose **c.** . Growth curves of PXO99A and  $\Delta$ *sux* synthetic minimal medium (NSM) and NSM + 1 % glucose (n=4). *In vitro* experiments were conducted at least three times independently. Genotypes are numbered: 1 Wild type control, PXO99; the mutants 2  $\Delta$ *sux*; 3  $\Delta$ *suxA*; 4  $\Delta$ *suxB*; 5  $\Delta$ *suxC*; 6  $\Delta$ *suxR*; complementation with constructs using E. coli Lac promoter 7  $\Delta$ *suxA/suxA*; 9  $\Delta$ *suxB/suxB*; 11  $\Delta$ *suxC/suxC*; 13  $\Delta$ *suxR/suxR*; and complementation with constructs using native *Xoo* promoters 8  $\Delta$ *suxA/pA-suxA*; 10  $\Delta$ *suxB/pA-suxB*; 12  $\Delta$ *suxC/pC-suxC*; and 14  $\Delta$ *suxR/pR-suxR*

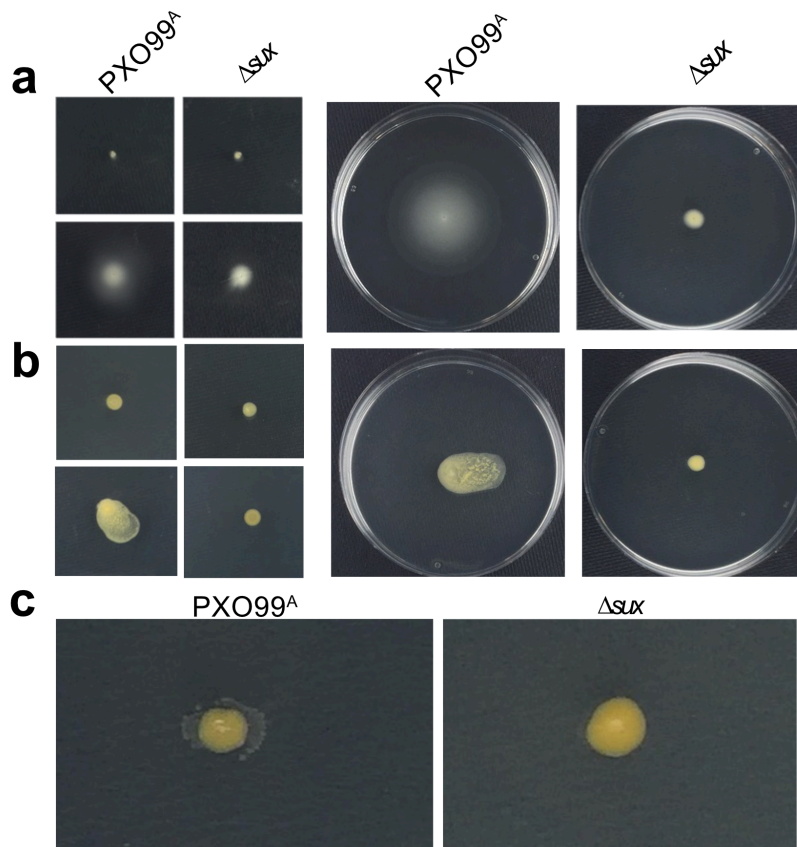

**S5 Figure. Swimming and swarming motility of  $\Delta sux$  mutant.** **a.** swimming on solid NBN + 1 % sucrose and 0.3 % agar **b.** swarming assays on solid NBN + 1 % sucrose and 0.6 % agar. **c.** Twitching assays. Comparable results were obtained in three independent experiments.

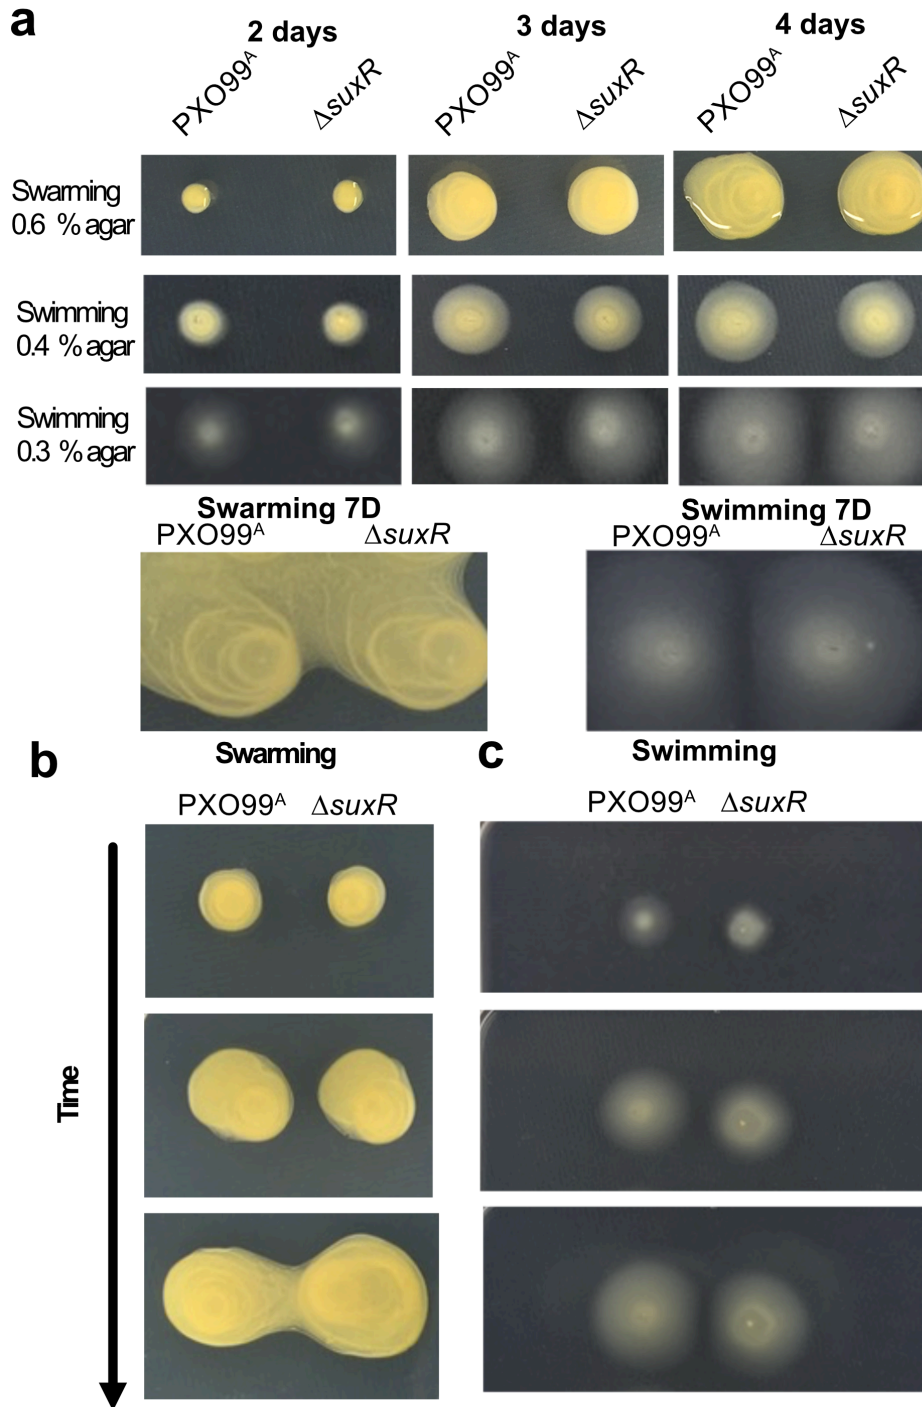

**S6 Figure. Swimming and swarming motility of  $\Delta$ suxR mutant.** **a.** swimming and swarming on solid NBN + 1 % sucrose with 0.3 % agar or 0.6 % agar, respectively. **b.** similar assays for swarming motility and **c.** for swimming motility on circulate petri dishes . Comparable results were obtained in three independent experiments.

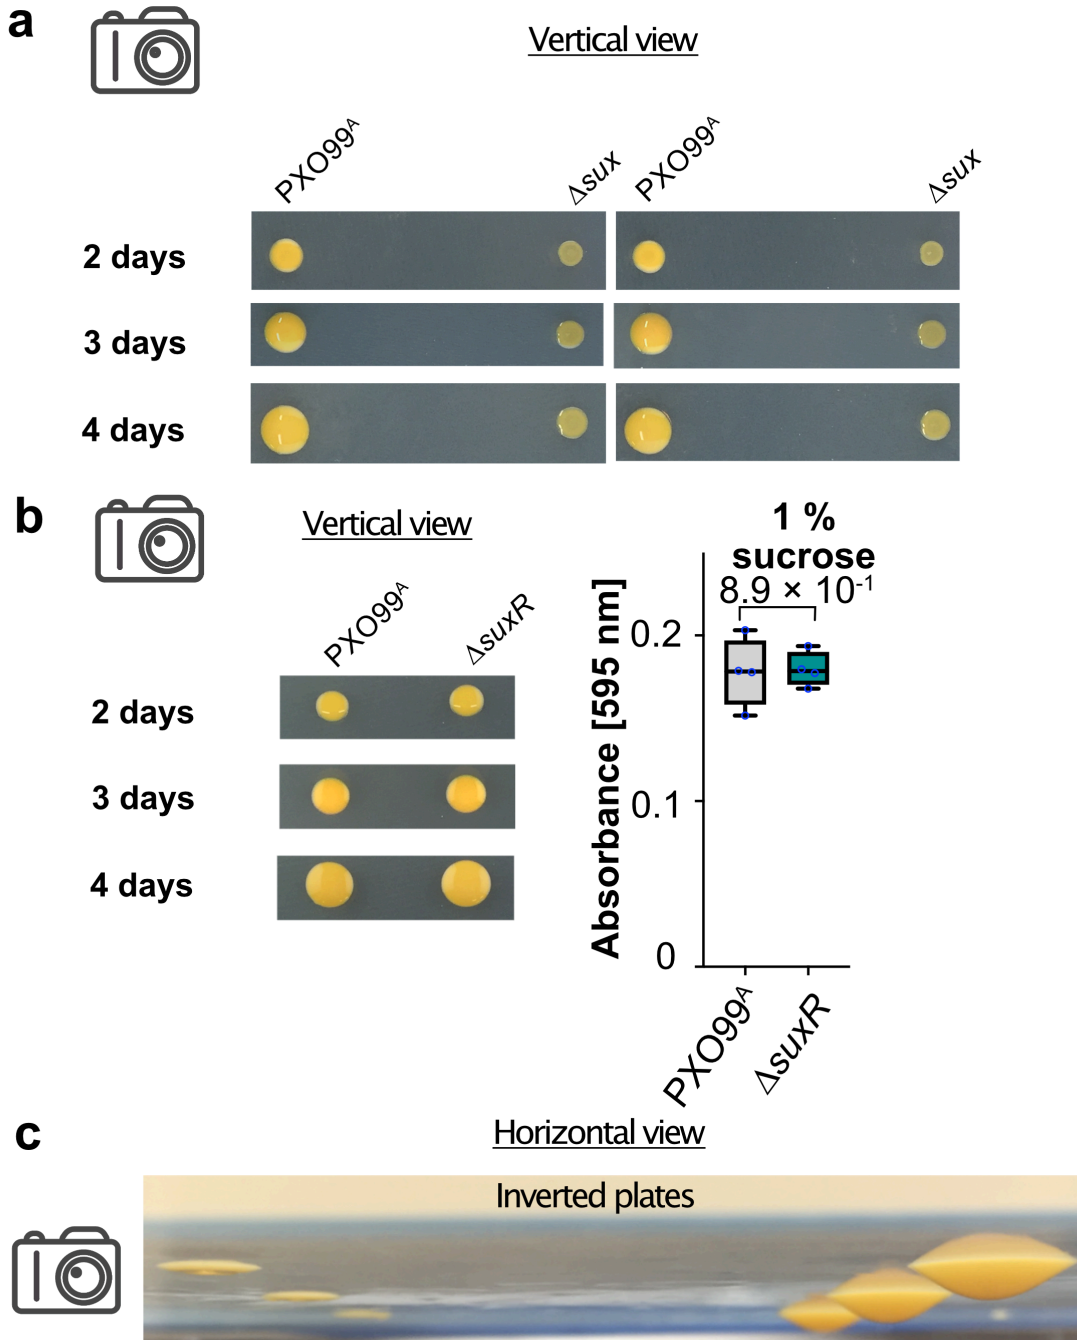

**S7 Figure. Δ*sux* and Δ*suxB* mutants show complete EPS deficiency. a.** Colony phenotype of PXO99<sup>A</sup> and Δ*sux* mutant and **b.** Δ*suxR* mutant on solid NBN + 1 % of sucrose grown uninverted for day 2, day 3 and day 4. Photography was performed vertically (from the top). Biofilm formation was determined in *Xoo* cultures in NBN + 1 % sucrose followed by crystal violet staining (n=4) **c.** Colony morphology on inverted plates (NBN + 1 % of sucrose). Photography was performed horizontally (from the side). Boxes extend from 25th to 75th percentiles and display median values as center lines. Whiskers plot minimum and maximum values and individual data points. Significance was calculated between two groups using unpaired two-tailed Student's *t*-Test at the 95 % confidence level and Welch's correction of unequal variances. Comparable results were obtained in three independent experiments.

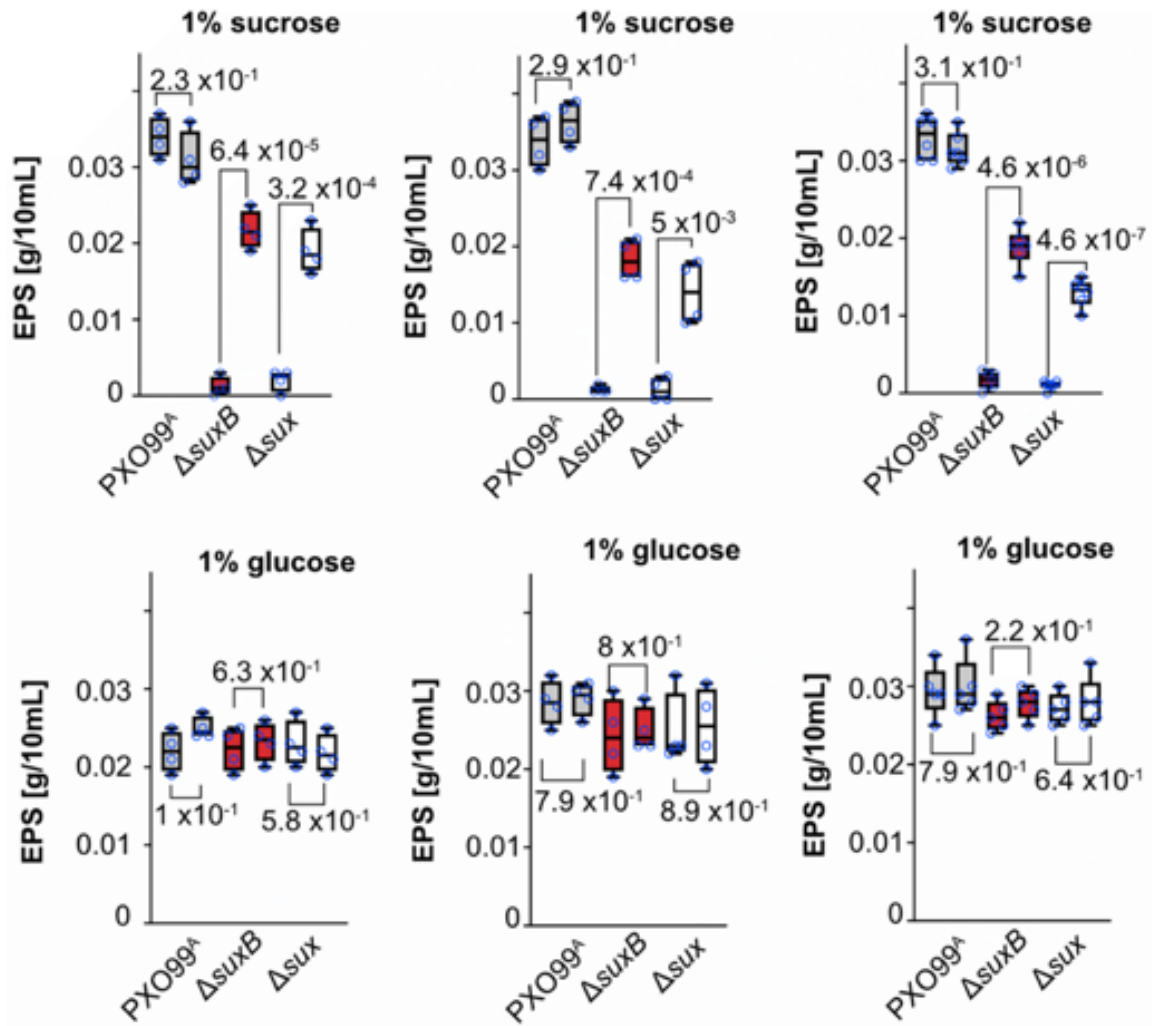

**S8 Figure. Quantification of EPS levels in Xoo mutants in the presence of sucrose or glucose.** The ability of wild-type PXO99A and *sux* mutant strains to produce EPS was assessed in the presence of sucrose or glucose. Data from three biological samples. Boxes extend from 25th to 75th percentiles and display median values as center lines. Whiskers plot minimum and maximum values and individual data points. Significance was calculated between two groups using unpaired two-tailed Student's t test at the 95 % confidence level and Welch's correction of unequal variances. Comparable results were obtained in three independent experiments.

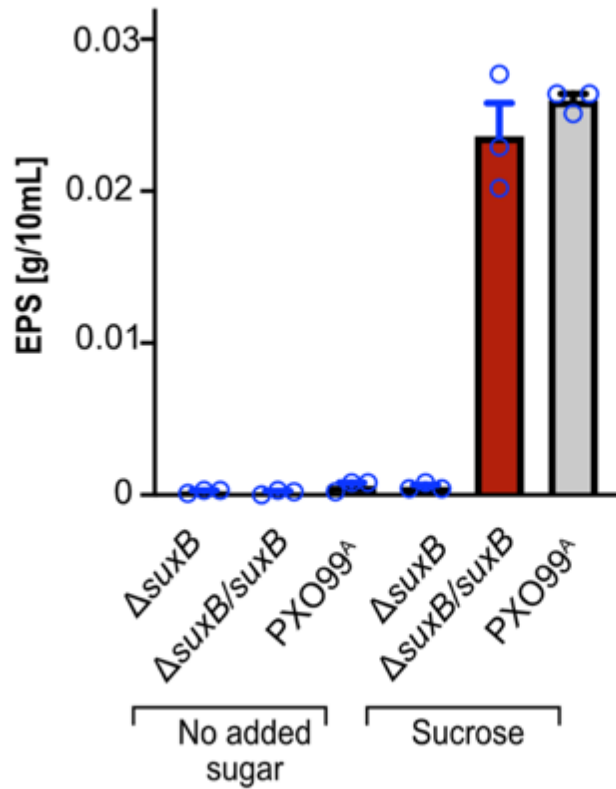

**S9 Figure. Sucrose uptake-dependent EPS production in complemented strains.**

Quantification of EPS production in the wild type strain PXO99<sup>A</sup>, in the  $\Delta$ suxB mutant and in a  $\Delta$ suxB mutant complemented with the *suxB* gene driven from the *lacZ* promoter in the presence and absence of sucrose (n=3). Comparable results were obtained for the sucrose induction in three independent experiments.

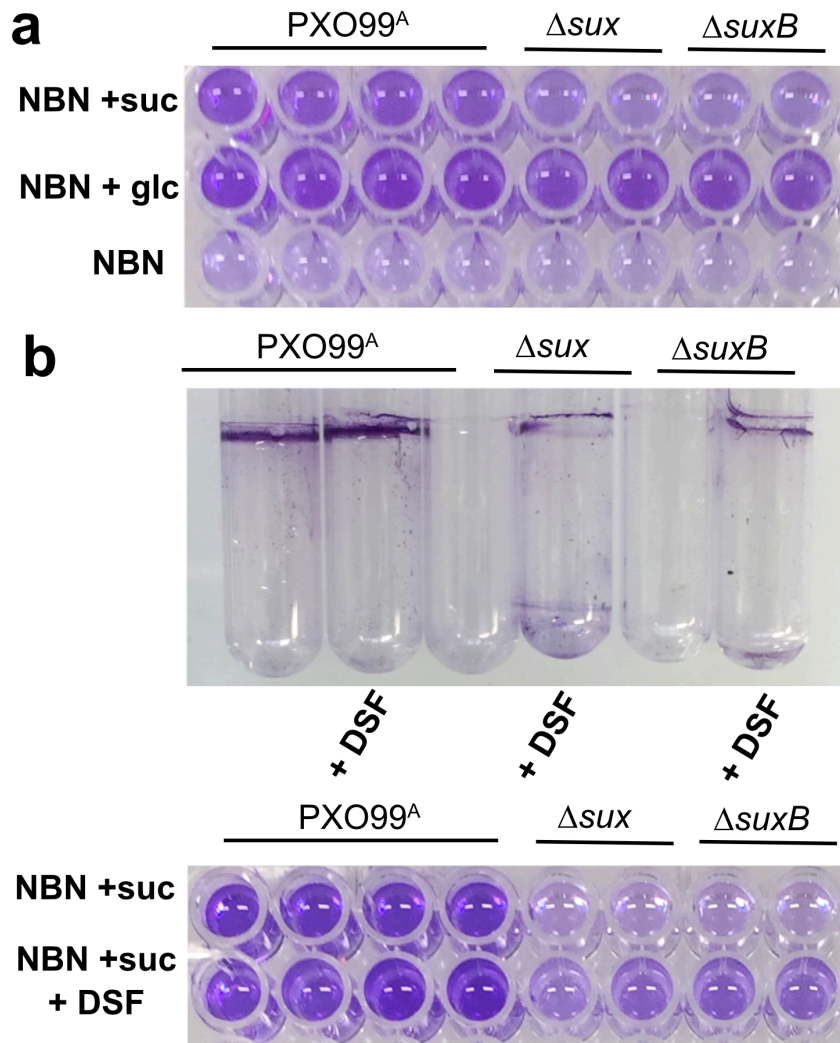

**S10. Figure. Sucrose uptake and biofilm formation.** **a.** Biofilm formation assays of the wild type strain PXO99<sup>A</sup> and the  $\Delta$ sux and  $\Delta$ suxB mutants in a 96-well plate. **b.** Qualitative and quantitative assays for biofilm formation assays in glass tube when complemented with DSF. Biofilm formation was determined in *Xoo* cultures in NB + 1 % sucrose followed by crystal violet staining. Comparable results were obtained for the sucrose induction in three independent experiments.

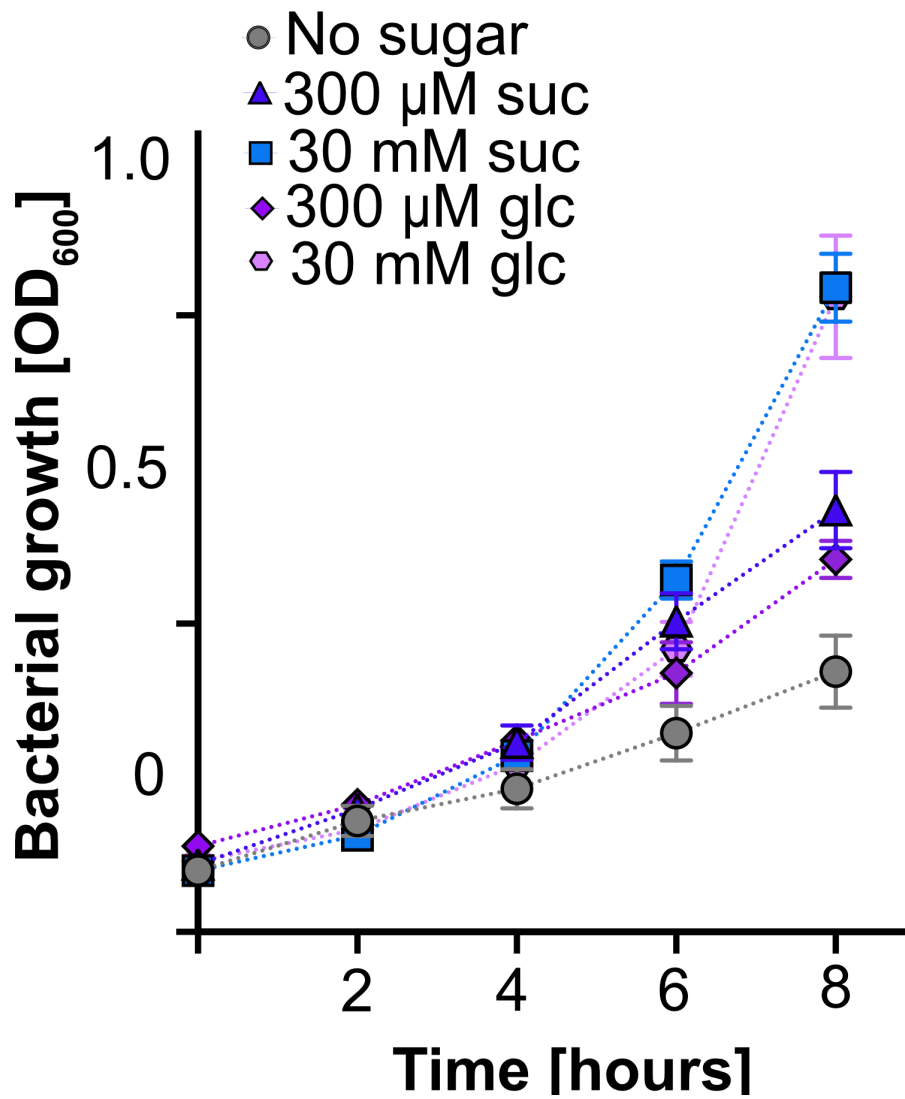

**S11 Figure. Growth of *Xoo* on sugar. a.** Growth of PXO99<sup>A</sup> in the presence or absence of 300μM sucrose or glucose. Similar results were obtained in three independent experiments.



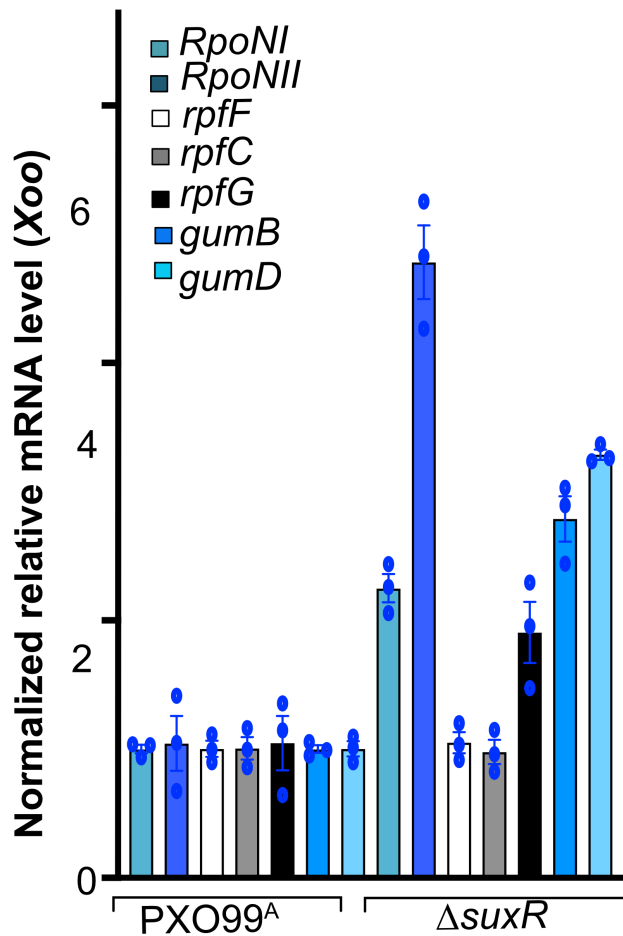

**S12 Figure. Regulation of genes in  $\Delta$ suxR mutant.** Gene expression on mRNA levels in PXO99<sup>A</sup> and  $\Delta$ suxR mutant. The  $2^{-\Delta\Delta C_t}$  method was used for quantification. The  $2^{-\Delta\Delta C_t}$  method was used for relative quantification with 16S rRNA as reference. Relative mRNA levels *in vitro* are normalized to 1 for values for data from PXO99<sup>A</sup> without added sugar without SuxR-mediated derepression.

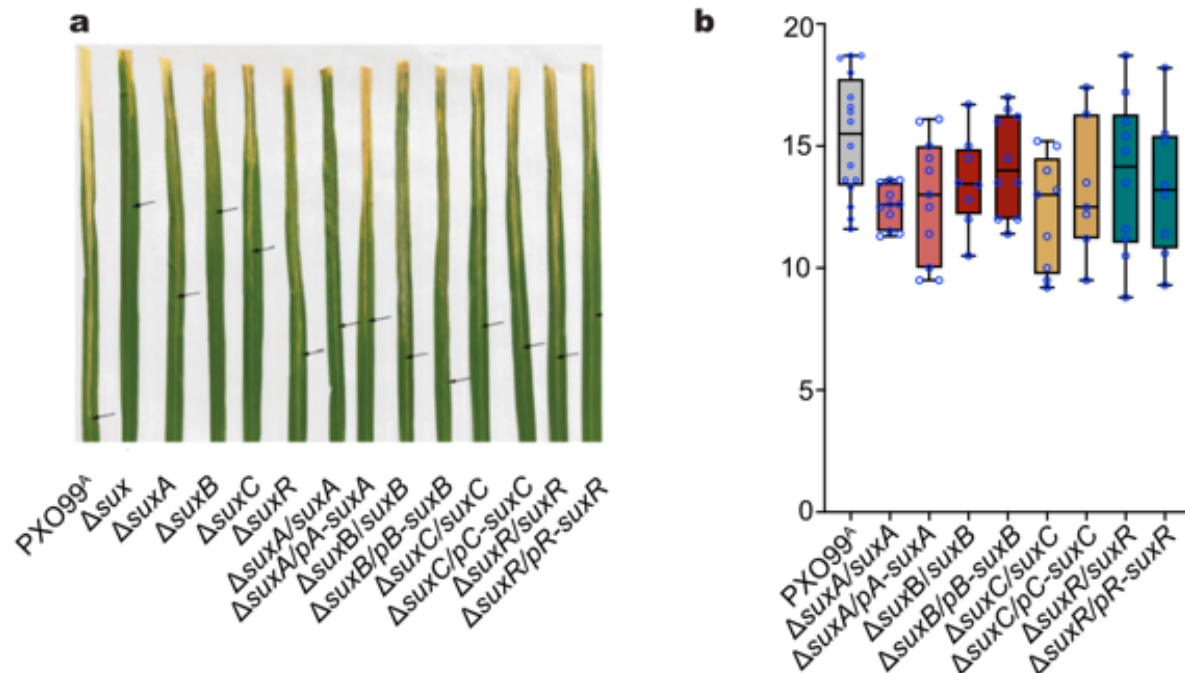

**S13 Figure. Virulence of complemented strains using synthetic and endogenous promoters of *sux* genes.** **a.** Leaf phenotypes in rice cultivar Nipponbare after clip infection with PXO99A, *sux* mutants and complementation strains at 12 DPI. **b.** Quantification of lesion length for two types of complementation strains: complementation with constructs using *E. coli* Lac promoter in  $\Delta$ *suxA/suxA*;  $\Delta$ *suxB/suxB*;  $\Delta$ *suxC/suxC*; and  $\Delta$ *suxR/suxR*; and complementation with constructs using native *Xoo* promoters in  $\Delta$ *suxA/pA-suxA*;  $\Delta$ *suxB/pA-suxB*;  $\Delta$ *suxC/pC-suxC*; and  $\Delta$ *suxR/pR-suxR*. Boxes extend from 25th to 75th percentiles and display median values as center lines. Whiskers plot minimum and maximum values and individual data points. Significance was calculated between two groups using unpaired two-tailed Student's t test at the 95 % confidence level and Welch's correction of unequal variances. Similar results were obtained in three independent experiments. Significance listed only for pairs that showed a significant difference ( $p < 0.05$ ).
